# Supplementary material
Source: HighWire-hosted journal article supplement (https://erj.ersjournals.com/content/52/3/1800864)
Supplement: inline-supplementary-material-1 [file inline-supplementary-material-1.pdf]

## Appendix A: Search Strategies

MEDLINE (Ovid SP) search strategy

#1 ((pneumothor\*[Title]) AND recurr\*[Title/Abstract])

#2 (((pneumothor\*) AND recurrence[MeSH Terms]))

#3 (pneumothorax[Title]) AND epidemiology[Title/Abstract]

#4 (#1 OR #2 OR #3)

Embase (Ovid SP) search strategy

#1 pneumothor\*.ti and recurr\*.ab

#2 (pneumothor\* and recurr\*).ti

#3 pneumothor\*.ti and recurrence.kw

#4 (pneumothor\* and epidemiology).ti

#5 (1 or 2 or 3 or 4)

## Appendix B: Data collection Sheet

|                                |  |
|--------------------------------|--|
| Name of study                  |  |
| Authors                        |  |
| Date                           |  |
| Type of study                  |  |
| Interventions                  |  |
| N (PSP)                        |  |
| M:F                            |  |
| Excluded patients              |  |
| 1st or 2nd recurrence included |  |
| Overall recurrence             |  |
| Follow-up period (months)      |  |
| 1 year recurrence              |  |
| 2 year recurrence              |  |
| weight categories              |  |
| Weight Recurrence              |  |
| Gender Recurrence              |  |
| Smoking Recurrence             |  |
| Proportion Surgery             |  |
| Proportion pleurodesis         |  |
| Conservative Recurrence        |  |
| Aspiration Recurrence          |  |
| ICD Recurrence                 |  |
| Ipsilateral/contralateral      |  |

## Appendix C: Risk of bias

### Randomised trials

|                | Randomisation | Allocation of Concealment | Blinding of participants and personal | Blinding of outcome assessment | Incomplete data outcome | Selective reporting | Other Bias |
|----------------|---------------|---------------------------|---------------------------------------|--------------------------------|-------------------------|---------------------|------------|
| Al-Mourgi 2015 | ?             | ?                         | -                                     | ?                              | +                       | -                   | -          |
| Chen 2013      | +             | +                         | -                                     | +                              | +                       | +                   | +          |
| Harvey 1994    | ?             | ?                         | -                                     | ?                              | ?                       | ?                   | ?          |
| Light 1990     | +             | ?                         | -                                     | +                              | +                       | +                   | +          |

Figure S1: Risk of bias summary: review authors' judgements about each risk of bias item for each included study.

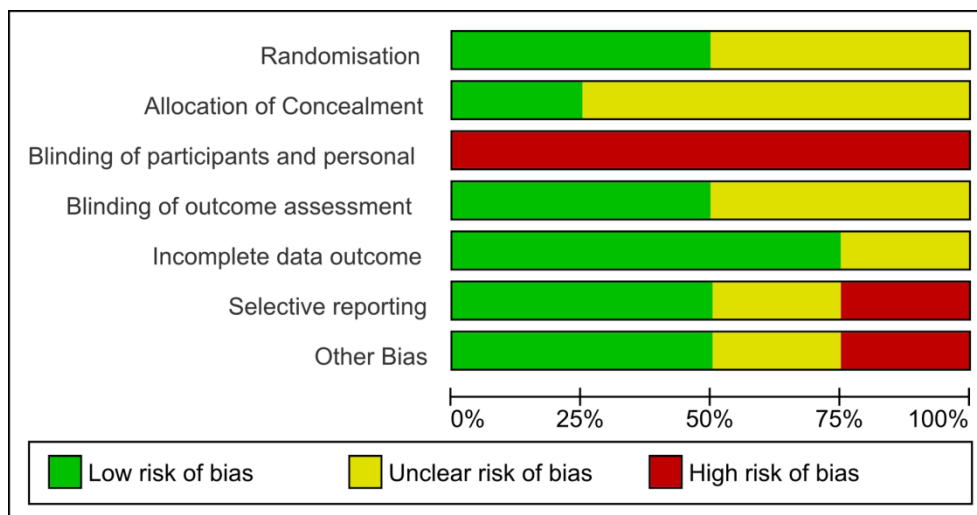

Figure S2: Risk of bias graph: review authors' judgements about each risk of bias item presented as percentages across all included study.

Non-randomised studies

| Authors                    | Selection                                    |                                         |                                   |                                                                                  | Comparability                                                            | Assessment of outcomes (Max:★) | Outcome                                                 |                                          | Total score (out of 10) |
|----------------------------|----------------------------------------------|-----------------------------------------|-----------------------------------|----------------------------------------------------------------------------------|--------------------------------------------------------------------------|--------------------------------|---------------------------------------------------------|------------------------------------------|-------------------------|
|                            | Representativeness of exposed cohort (Max:★) | Selection of non-exposed cohort (Max:★) | Ascertainment of exposure (Max:★) | Demonstration that outcome of interest was not present at start of study (Max:★) | Comparability of cohorts on the basis of the design or analysis (Max:★★) |                                | Was follow-up long enough for outcomes to occur (Max:★) | Adequacy of follow up of cohorts (Max:★) |                         |
| Al-Alawi et al. 2009       | ★                                            | -                                       | ★                                 | -                                                                                | -                                                                        | ★                              | ★                                                       | ★                                        | 5                       |
| Andersen et al. 1965       | ★                                            | -                                       | ★                                 | -                                                                                | -                                                                        | -                              | ★                                                       | ★                                        | 4                       |
| Casali et al. 2013         | ★                                            | -                                       | ★                                 | -                                                                                | -                                                                        | ★                              | ★                                                       | ★                                        | 5                       |
| Chan et al. 2006           | ★                                            | -                                       | ★                                 | -                                                                                | -                                                                        | -                              | ★                                                       | ★                                        | 4                       |
| Chen et al. 2008           | ★                                            | ★                                       | ★                                 | ★                                                                                | ★                                                                        | ★                              | -                                                       | ★                                        | 7                       |
| Chen et al. 2008           | ★                                            | ★                                       | ★                                 | ★                                                                                | ★                                                                        | ★                              | -                                                       | -                                        | 6                       |
| Ganesalingam et al. 2010   | ★                                            | -                                       | ★                                 | -                                                                                | -                                                                        | ★                              | ★                                                       | ★                                        | 5                       |
| Huang et al. 2017          | ★                                            | -                                       | ★                                 | ★                                                                                | -                                                                        | ★                              | ★                                                       | ★                                        | 6                       |
| Karasaki et al. 2014       | ★                                            | -                                       | ★                                 | ★                                                                                | -                                                                        | -                              | -                                                       | -                                        | 3                       |
| Kim et al. 2014            | ★                                            | -                                       | ★                                 | ★                                                                                | -                                                                        | -                              | -                                                       | -                                        | 3                       |
| Kuan et al. 2009           | ★                                            | -                                       | ★                                 | -                                                                                | -                                                                        | ★                              | -                                                       | -                                        | 3                       |
| Lichter et al. 1974        | -                                            | -                                       | ★                                 | ★                                                                                | -                                                                        | ★                              | ★                                                       | ★                                        | 5                       |
| Martinez-Ramos et al. 2007 | -                                            | -                                       | ★                                 | ★                                                                                | -                                                                        | ★                              | ★                                                       | ★                                        | 5                       |
| Mehta et al. 2016          | ★                                            | -                                       | ★                                 | ★                                                                                | -                                                                        | -                              | ★                                                       | -                                        | 4                       |
| Nishiuma et al. 2012       | -                                            | -                                       | ★                                 | ★                                                                                | -                                                                        | ★                              | ★                                                       | -                                        | 4                       |
| Noh et al. 2015            | ★                                            | -                                       | ★                                 | ★                                                                                | -                                                                        | ★                              | ★                                                       | -                                        | 5                       |
| Noh et al. 2015            | ★                                            | -                                       | ★                                 | -                                                                                | -                                                                        | ★                              | ★                                                       | ★                                        | 5                       |
| Olesen et al. 2016         | ★                                            | -                                       | ★                                 | ★                                                                                | -                                                                        | ★                              | ★                                                       | ★                                        | 6                       |
| Ouanes-Besbes et al. 2006  | ★                                            | -                                       | ★                                 | -                                                                                | -                                                                        | ★                              | ★                                                       | ★                                        | 5                       |
| Primavesi et al. 2016      | ★                                            | ★                                       | ★                                 | -                                                                                | -                                                                        | -                              | ★                                                       | ★                                        | 5                       |
| Sadikot et al. 1997        | -                                            | -                                       | ★                                 | ★                                                                                | -                                                                        | -                              | ★                                                       | ★                                        | 4                       |
| Sayar et al. 2014          | ★                                            | -                                       | ★                                 | -                                                                                | -                                                                        | ★                              | ★                                                       | ★                                        | 5                       |
| Schramel et al. 1996       | ★                                            | ★                                       | ★                                 | -                                                                                | ★                                                                        | -                              | ★                                                       | -                                        | 5                       |
| Tan et al. 2017            | ★                                            | -                                       | ★                                 | ★                                                                                | -                                                                        | ★                              | ★                                                       | ★                                        | 6                       |
| Tulay et al. 2015          | ★                                            | -                                       | ★                                 | -                                                                                | ★                                                                        | ★                              | -                                                       | ★                                        | 5                       |

Figure S3: Quality assessment of studies in the meta-analysis based on modified Newcastle-Ottawa Scale Judgement
